# Supplementary material for: Overcoming multidrug resistance through co-delivery of ROS-generating nano-machinery in cancer therapeutics
Source: Royal Society of Chemistry journal article supplement (doi:10.1039/c6tb03146c), 2017-01-01
Supplement: c6tb03146c1.pdf [file c6tb03146c1.pdf]

*Supporting Information*

## Overcoming multidrug resistance through co-delivery of ROS-generating Nano-machinery in cancer therapeutics†

Ranjith Kumar Kankala,<sup>a,b,§</sup> Pei-Yu Tsai,<sup>a,§</sup> Yaswanth Kuthati,<sup>a</sup> Pei-Ru Wei,<sup>a</sup> Chen-Lun Liu<sup>a</sup> and Chia-Hung Lee<sup>a\*</sup>

<sup>a</sup>*Department of Life Science and Institute of Biotechnology, National Dong Hwa University, Hualien, 974, Taiwan.*

<sup>b</sup>*College of Chemical Engineering, Huaqiao University, Xiamen, China.*

\*E-mail address: [chlee016@mail.ndhu.edu.tw](mailto:chlee016@mail.ndhu.edu.tw)

§These authors contributed equally.

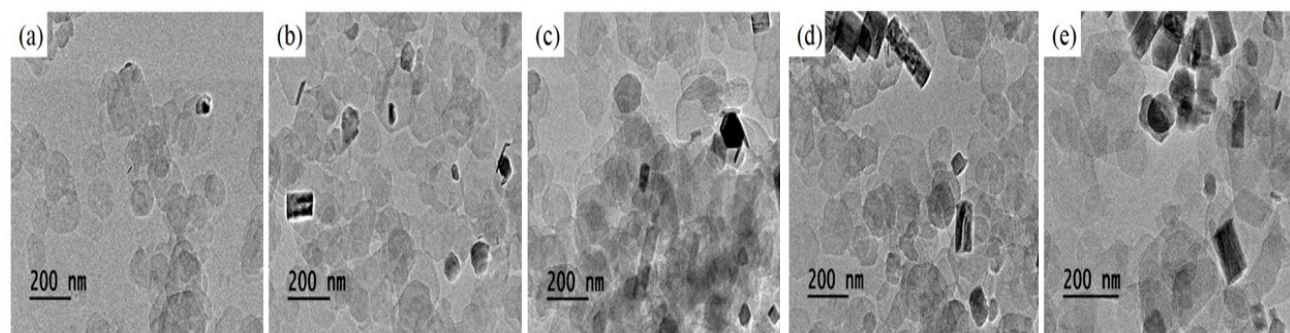

**Fig. S1** Transmission electron microscopic images of various LDH and its successive nanoconjugates, (a) LDH, (b) LDH-NH<sub>2</sub>, (c) AA-LDH, (d) Cu-LDH, and (e) Dox-LDH.

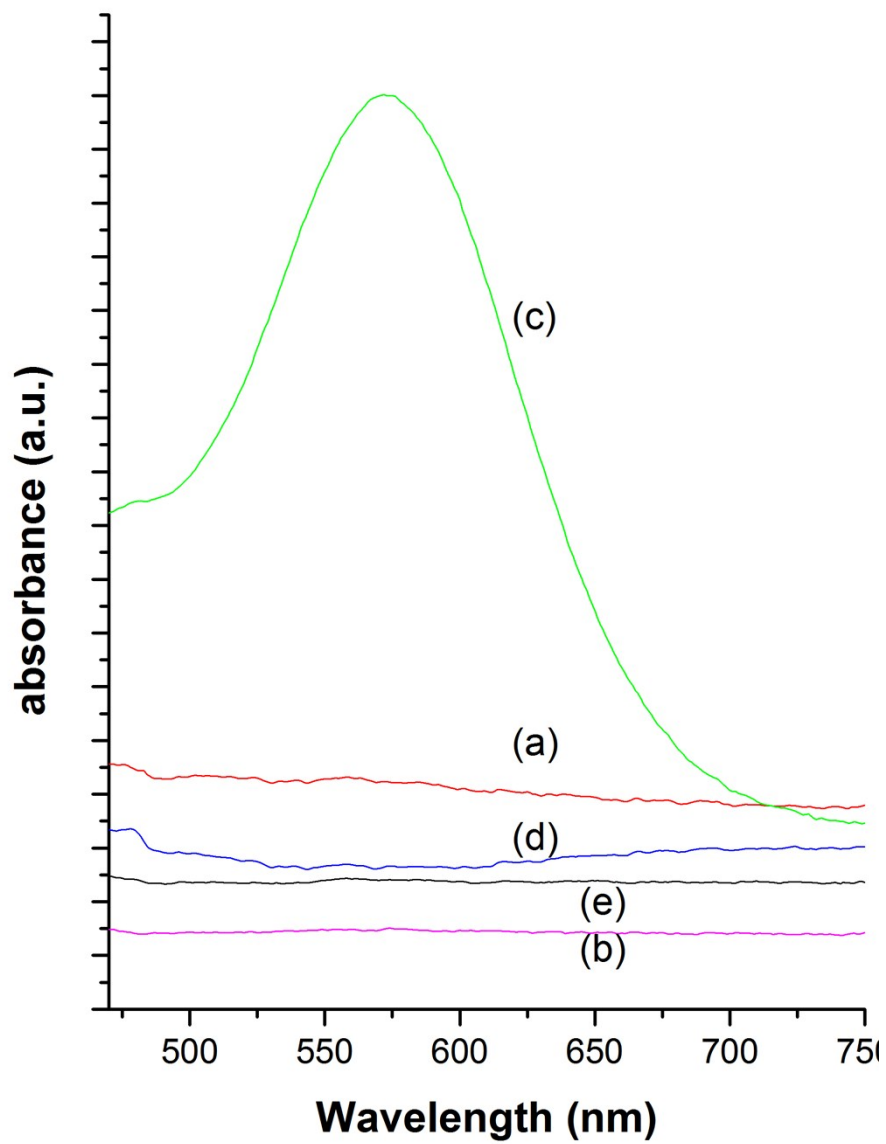

**Fig. S2** Ninhydrin assay (a) Ninhydrin, (b) LDH, (c) LDH-NH<sub>2</sub>, (d) Cu-LDH and (e) Dox-LDH.

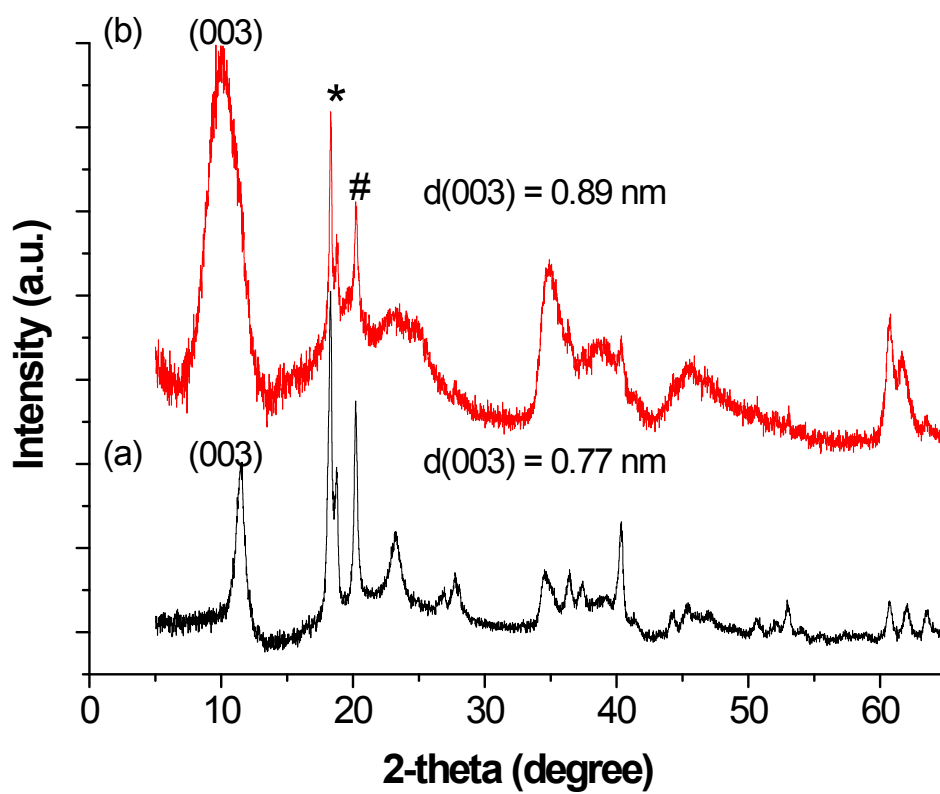

**Fig. S3** PXRD patterns of (a) LDH and (b) AA-LDH. \* and # represents brucite and gibbsite formation, respectively.

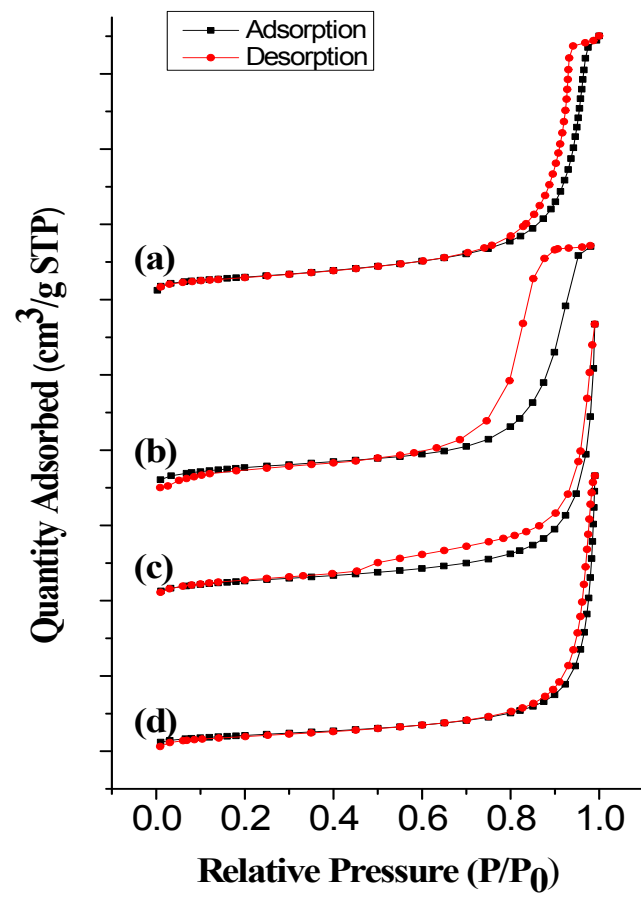

**Fig. S4** Nitrogen adsorption–desorption isotherm patterns of various LDH samples, (a) LDH, (b) LDH-NH<sub>2</sub>, (c) AA-LDH and (d) Cu-LDH.

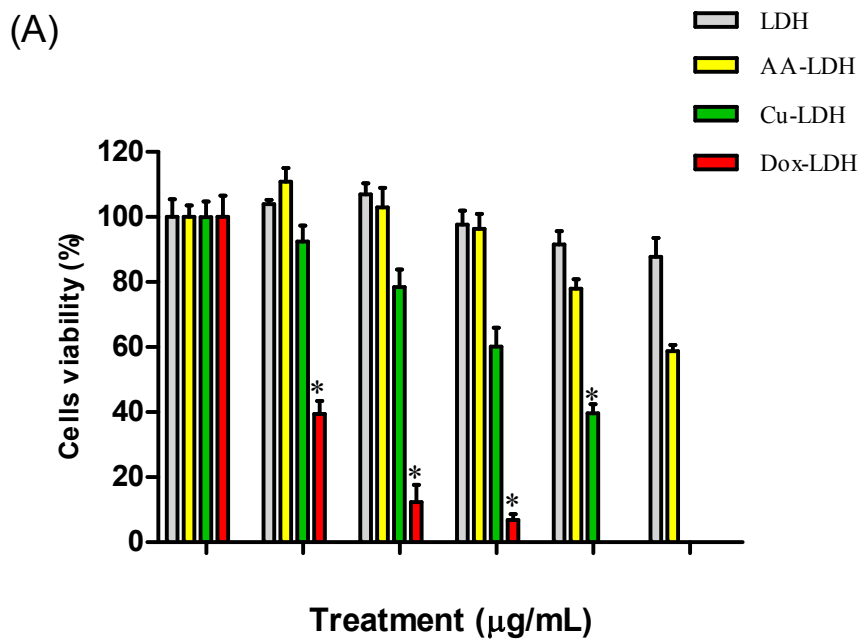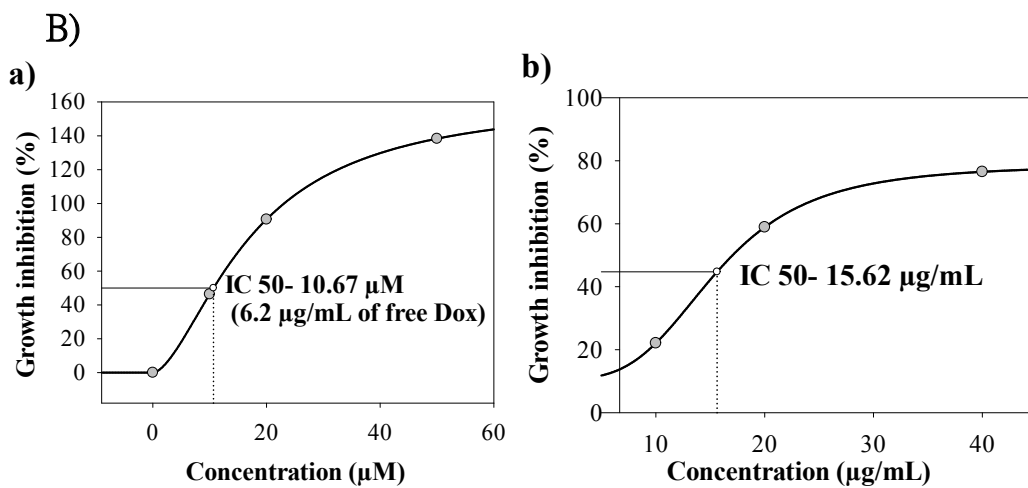

**Fig. S5** (A) SRB assay of LDH, AA-LDH, Cu-LDH and Dox-LDH in HT-29 cells ( $*p < 0.001$ , as compared with control), (B) IC<sub>50</sub> plots of (a) free doxorubicin and (b) Dox-LDH treated in HT-29 cells.

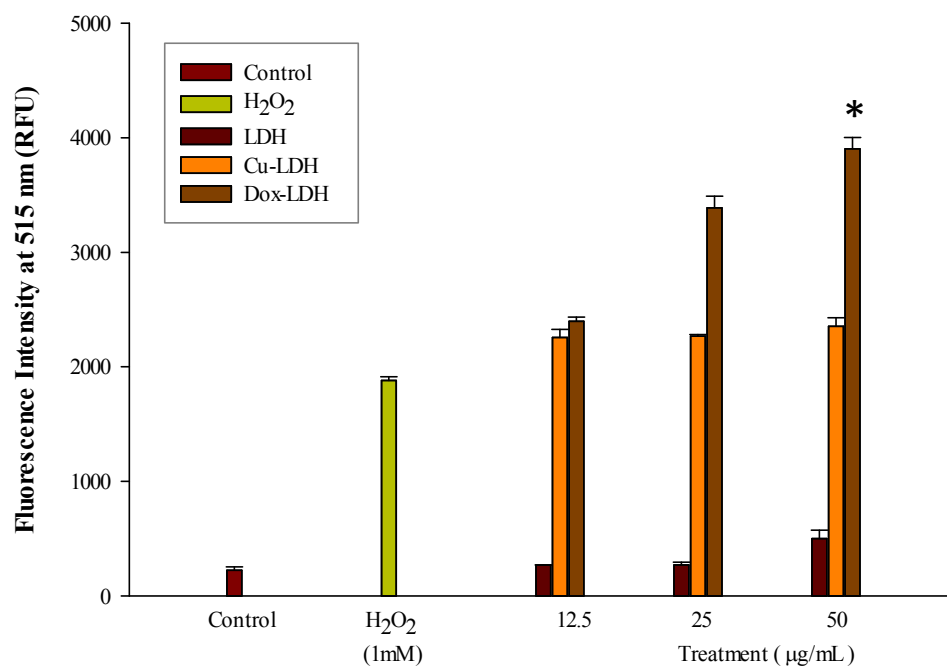

**Fig. S6** Determination of ROS generation using DCFH-DA in control, hydrogen peroxide (H<sub>2</sub>O<sub>2</sub>) (1 mM), Pristine LDH, Cu-LDH and Dox-LDH in HT-29 cell line (\**p* < 0.001, as compared with control).
